# Supplementary material for: Evolutionary Epidemiology of Drug-Resistance in Space
Source: PLOS journal article supplement (doi:10.1371/journal.pcbi.1000337), 2009-04-02
Supplement: S1 (10.1371/journal.pcbi.1000337.s001) [file journal.pcbi.1000337.s001]

1 **Supplementary Information**  
2 **for "Evolutionary Epidemiology of Drug-Resistance in Space"**

3 Florence Débarre\*, Thomas Lenormand\*, Sylvain Gandon\*

4 \* Centre d'Ecologie Fonctionnelle et Evolutive, CNRS – UMR 5175, 1919 route de Mende,  
5 F-34293 Montpellier Cedex 5

6 **Contents**

7 **1 Direct-transmission model** **2**

8 1.1 Drug-resistant strain's invasion condition when  $R_0^{WT,T} > 1$  . . . . . 2

9 1.2 Drug-resistant strain's invasion condition when  $R_0^{WT,T} < 1$  . . . . . 4

10 1.3 Drug-sensitive strain's invasion condition . . . . . 4

11 1.4 Homogeneous partial treatment . . . . . 4

12 1.5 Feedback of demography on the evolution of resistance . . . . . 6

13 **2 Vector-borne transmission model** **9**

14 2.1 Full Model . . . . . 9

15 2.2 Compound parameters . . . . . 10

16 2.3 Equivalent migration . . . . . 10

17 2.4 Drug-resistant strain's invasion condition . . . . . 11

18 2.5 Drug-sensitive strain's invasion condition . . . . . 12

19 **References** **13**

## 20 1 Direct-transmission model

### 21 1.1 Drug-resistant strain's invasion condition when $R_0^{\text{WT},\text{T}} > 1$

22 We want to determine the condition of the size of the treated area, for drug-resistant  
23 parasites to invade a drug-sensitive parasite population.

24 To simplify the calculations, we focus on the part of the (periodic) environment  
25 located between  $-A$  and  $B$  on the space axis, and assume that the area between  $-A$   
26 and  $0$  is treated.

27 If the migration range is low enough and  $R_0^{\text{WT},\text{T}} > 1$ , we can approximate the drug-  
28 resistant free equilibrium to:

$$\tilde{I}_{\text{WT}}(x) = \begin{cases} N (1 - 1/R_0^{\text{WT},\text{T}}) & , \quad -A \leq x < 0 \\ N (1 - 1/R_0^{\text{WT},\text{U}}) & , \quad 0 < x \leq B \end{cases} \quad (\text{A1a})$$

$$\tilde{I}_{\text{R}}(x) = 0 \quad (\text{A1b})$$

29 Linearizing equation (14b) in the main text around this equilibrium, we obtain:

$$\frac{\partial I_{\text{R}}}{\partial t} = \begin{cases} \left( \frac{R_0^{\text{R}}}{R_0^{\text{WT},\text{T}}} - 1 \right) \gamma_{\text{R}} I_{\text{R}} + \frac{\sigma^2}{2} \frac{\partial^2 I_{\text{R}}}{\partial x^2} & , \quad -A \leq x < 0 \\ \left( \frac{R_0^{\text{R}}}{R_0^{\text{WT},\text{U}}} - 1 \right) \gamma_{\text{R}} I_{\text{R}} + \frac{\sigma^2}{2} \frac{\partial^2 I_{\text{R}}}{\partial x^2} & , \quad 0 < x \leq B \end{cases} \quad (\text{A2})$$

30 with the boundary conditions:

$$\partial I_{\text{R}}/\partial x|_{x=-A} = \partial I_{\text{R}}/\partial x|_{x=B} = 0 \quad (\text{A3})$$

31 and with the continuity conditions [1] (recall that  $\tau = \frac{1 - 1/R_0^{\text{WT,U}}}{1 - 1/R_0^{\text{WT,T}}}$ ):

$$\tau \lim_{x \xrightarrow{\leq} 0} I_R = \lim_{x \xrightarrow{\geq} 0} I_R \quad (\text{A4a})$$

$$\frac{1}{\tau} \lim_{x \xrightarrow{\leq} 0} \frac{\partial I_R}{\partial x} = \lim_{x \xrightarrow{\geq} 0} \frac{\partial I_R}{\partial x} \quad (\text{A4b})$$

32 By separating the time and space scales [2, 3], we obtain the following system:

$$\frac{\partial^2 I_R}{\partial x^2}(x) = -\frac{2}{\sigma^2} \left( \frac{R_0^{\text{R}}}{R_0^{\text{WT,T}}} - 1 \right) \gamma_{\text{R}} I_{\text{R}}(x), \quad -A \leq x < 0 \quad (\text{A5a})$$

$$\frac{\partial^2 I_R}{\partial x^2}(x) = \frac{2}{\sigma^2} \left( 1 - \frac{R_0^{\text{R}}}{R_0^{\text{WT,U}}} \right) \gamma_{\text{R}} I_{\text{R}}(x), \quad 0 < x \leq B \quad (\text{A5b})$$

Solving system (A5) with the boundary (A3) and continuity (A4) conditions, we obtain the following constraint on the parameters:

$$\begin{aligned} & \sqrt{\frac{2}{\sigma^2} \left( \frac{R_0^{\text{R}}}{R_0^{\text{WT,T}}} - 1 \right) \gamma_{\text{R}}} \tan \left[ \sqrt{\frac{2}{\sigma^2} \left( \frac{R_0^{\text{R}}}{R_0^{\text{WT,T}}} - 1 \right) \gamma_{\text{R}}} A \right] \\ & = \tau^2 \sqrt{\frac{2}{\sigma^2} \left( 1 - \frac{R_0^{\text{R}}}{R_0^{\text{WT,U}}} \right) \gamma_{\text{R}}} \tanh \left[ \sqrt{\frac{2}{\sigma^2} \left( 1 - \frac{R_0^{\text{R}}}{R_0^{\text{WT,U}}} \right) \gamma_{\text{R}}} B \right] \end{aligned} \quad (\text{A6})$$

33 solving equation (A6) for  $A$ , we recover the critical width of the treated area (see equation  
34 (8) in the main text):

$$A_c^{\text{local}} = \frac{\sigma}{\sqrt{2}} \frac{1}{\sqrt{\gamma_{\text{R}}}} \frac{1}{\sqrt{\frac{R_0^{\text{R}}}{R_0^{\text{WT,T}}} - 1}} \arctan \left( \tau^2 \sqrt{\frac{1 - \frac{R_0^{\text{R}}}{R_0^{\text{WT,U}}}}{\frac{R_0^{\text{R}}}{R_0^{\text{WT,T}}} - 1}} \tanh \left[ \sqrt{\frac{2}{\sigma^2} \left( 1 - \frac{R_0^{\text{R}}}{R_0^{\text{WT,U}}} \right) \gamma_{\text{R}}} B \right] \right) \quad (\text{A7})$$

35 The drug-resistant free equilibrium is stable when  $A < A_c^{\text{local}}$  [4]: the drug-resistant  
36 parasites cannot invade when the size of the treated area is below this critical size.

## 37 1.2 Drug-resistant strain's invasion condition when $R_0^{\text{WT},\text{T}} < 1$

38 When the migration range is small (low  $\sigma$ ), we assume that the equilibrium density of  
 39 a population fixed for the drug-sensitive allele is  $N(1 - 1/R_0^{\text{WT}})$  in the untreated area  
 40 and 0 in the treated area (because  $R_0^{\text{WT},\text{T}} < 1$ ). Using the method developed in [2, 3, 5],  
 41 this leads to the following approximation for the critical size of the treated area:

$$A_c^{\text{local}(2)} = \frac{\sigma}{\sqrt{2}} \frac{\pi}{2} \frac{1}{\sqrt{\gamma_{\text{R}}}} \frac{1}{\sqrt{R_0^{\text{R}} - 1}} \quad (\text{A8})$$

## 42 1.3 Drug-sensitive strain's invasion condition

43 Using again the method developed in [2, 3], we find that the drug-sensitive parasites  
 44 can only invade a population fixed for the drug-resistant parasites when the size of the  
 45 untreated area is greater than a critical size  $B_c$ . This critical size reads:

$$B_c = \frac{\sigma}{\sqrt{2}} \frac{1}{\sqrt{\gamma_{\text{WT}}^{\text{U}}}} \frac{1}{\sqrt{\frac{R_0^{\text{WT},\text{U}}}{R_0^{\text{R}}} - 1}} \arctan \left( \sqrt{\frac{\gamma_{\text{WT}}^{\text{T}}}{\gamma_{\text{WT}}^{\text{U}}}} \sqrt{\frac{1 - \frac{R_0^{\text{WT},\text{T}}}{R_0^{\text{R}}}}{\frac{R_0^{\text{WT},\text{U}}}{R_0^{\text{R}}} - 1}} \tanh \left[ A \frac{\sqrt{2}}{\sigma} \sqrt{\gamma_{\text{WT}}^{\text{T}}} \sqrt{1 - \frac{R_0^{\text{WT},\text{T}}}{R_0^{\text{R}}}} \right] \right) \quad (\text{A9})$$

## 46 1.4 Homogeneous partial treatment

47 For comparison purposes, we have written a spatially homogeneous version of our one-  
 48 host SIS-model (direct transmission model), where at each point in space a proportion  
 49  $\rho = A/(A + B)$  of the population receives treatment, independent of the infectious  
 50 status. We have to distinguish treated from untreated individuals, and therefore add  
 51 compartments to the initial model ( $I_{\text{WT}} = I_{\text{WT}}^{\text{U}} + I_{\text{WT}}^{\text{T}}$ ). For the sake of readability, we  
 52 drop the time and space dependency of the  $I_{\text{WT}}^{\text{U}}$ ,  $I_{\text{WT}}^{\text{T}}$  and  $I_{\text{R}}$  variables, and we note

53  $I = I_{\text{WT}}^{\text{U}} + I_{\text{WT}}^{\text{T}} + I_{\text{R}}$ , the total density of infected individuals. The equations read:

$$\frac{\partial I_{\text{WT}}^{\text{U}}}{\partial t} = (1 - \rho) (\beta_{\text{WT}}^{\text{U}} I_{\text{WT}}^{\text{U}} + \beta_{\text{WT}}^{\text{T}} I_{\text{WT}}^{\text{T}}) (N - I) - \gamma_{\text{WT}}^{\text{U}} I_{\text{WT}}^{\text{U}} + \frac{\sigma^2}{2} \frac{\partial^2 I_{\text{WT}}^{\text{U}}}{\partial x^2} \quad (\text{A10a})$$

$$\frac{\partial I_{\text{WT}}^{\text{T}}}{\partial t} = \rho (\beta_{\text{WT}}^{\text{U}} I_{\text{WT}}^{\text{U}} + \beta_{\text{WT}}^{\text{T}} I_{\text{WT}}^{\text{T}}) (N - I) - \gamma_{\text{WT}}^{\text{T}} I_{\text{WT}}^{\text{T}} + \frac{\sigma^2}{2} \frac{\partial^2 I_{\text{WT}}^{\text{T}}}{\partial x^2} \quad (\text{A10b})$$

$$\frac{\partial I_{\text{R}}}{\partial t} = \beta_{\text{R}} I_{\text{R}} (N - I) - \gamma_{\text{R}} I_{\text{R}} + \frac{\sigma^2}{2} \frac{\partial^2 I_{\text{R}}}{\partial x^2} \quad (\text{A10c})$$

54 The first equation gives the dynamics of untreated individuals infected by the drug-  
 55 sensitive strain. The first term represents new infections: uninfected untreated indi-  
 56 viduals  $(1 - \rho)(N - I)$  are infected by individuals already infected by a drug-sensitive  
 57 strain, at a rate  $\beta_{\text{WT}}^j$  which depends on the treatment status  $j$  ( $j = \text{U}$  when untreated,  
 58  $j = \text{T}$  when treated) of the infecting individuals. Note that we make the simplifying  
 59 assumption that the treatment may have an effect on disease transmissibility, but not  
 60 on susceptibility to the disease. The second term is the recovery (or death), and the last  
 61 term accounts for migration.

62 The second equation gives the dynamics of treated individuals infected by the drug-  
 63 sensitive strain. The first term describes new infections: uninfected treated individuals  
 64  $\rho(N - I)$  are infected by individuals infected by the drug-sensitive strain ( $\beta_{\text{WT}}^{\text{U}} I_{\text{WT}}^{\text{U}} +$   
 65  $\beta_{\text{WT}}^{\text{T}} I_{\text{WT}}^{\text{T}}$ ). The second term is recovery (or death) and the last term migration.

66 The last equation gives the dynamics of individuals infected by the drug-resistant strain.  
 67 As the treatment has no effect on them, we do not have to distinguish between treated  
 68 and untreated individuals.

69 Using the next generation method [6], we find the following basic reproductive ratios:

70

$$R_0^{\text{WT}} = \frac{(1 - \rho)N\beta_{\text{WT}}^{\text{U}}}{\gamma_{\text{WT}}^{\text{U}}} + \frac{\rho N\beta_{\text{WT}}^{\text{T}}}{\gamma_{\text{WT}}^{\text{T}}} = (1 - \rho)R_0^{\text{WT,U}} + \rho R_0^{\text{WT,T}} \quad (\text{A11a})$$

$$R_0^{\text{R}} = \frac{N\beta_{\text{R}}}{\gamma_{\text{R}}} \quad (\text{A11b})$$

71 The condition for the invasion of the drug-resistant strain is

$$R_0^R > R_0^{\text{WT}} \quad (\text{A12})$$

72 The spatially heterogeneous strategy is such that all individuals are treated in a  
73 proportion  $A/(A+B)$  of the environment. With the spatially homogeneous strategy  
74 presented here, the same proportion ( $\rho = A/(A+B)$ ) of the total population is treated,  
75 but this proportion is the same everywhere in space. In order to compare the two  
76 strategies, we can rewrite equation (A12) as

$$A > A_c^{\text{homo}} \quad (\text{A13})$$

77 where

$$A_c^{\text{homo}} = B \frac{R_0^{\text{WT,U}} - R_0^R}{R_0^R - R_0^{\text{WT,T}}} \quad (\text{A14})$$

78 This expression with the basic reproductive ratios is also valid for the vector-borne  
79 transmission.

## 80 **1.5 Feedback of demography on the evolution of resistance**

81 To illustrate the effect of the feedback of demography on the evolution of resistance, we  
82 contrast the results of our direct transmission model, which is an epidemiological model  
83 (see equation 2b in the main text) with a model where the parasite population size is  
84 constrained to be constant over space [4]. This model without demographical feedback  
85 reads:

$$\frac{\partial p}{\partial t} = S(x) p (1 - p) + \frac{\sigma^2}{2} \frac{\partial^2 p}{\partial x^2} \quad (\text{A15})$$

86 where  $S(x)$  is a fitness function, such that, for  $-(A+B) < x < A+B$  ( $N_D$  standing

87 for non demographic):

$$S(x) = \begin{cases} s_{ND} = N(\beta_R - \beta_{WT}^T) - (\gamma_R - \gamma_{WT}^T) & |x| < A \\ -\alpha_{ND}^2 s_{ND} = N(\beta_R - \beta_{WT}^U) - (\gamma_R - \gamma_{WT}^U) & |x| \geq A \end{cases} \quad (\text{A16})$$

88  $S(x)$  in equation (A16) is equivalent to  $\bar{s}(I, x)$  (equation (5) in the main text) being  
 89 evaluated for  $I$  close to zero, which corresponds to an initial growth rate.

90 Nagylaki [4] derived the critical size of the area favorable to the allele of interest (i.e.  
 91 in our context, the treated area):

$$A_c^{Nagylaki} = \frac{\sigma}{\sqrt{2} s_{ND}} \arctan \left( \alpha_{ND} \tanh \left[ \alpha_{ND} \sqrt{s_{ND}} \frac{\sqrt{2}}{\sigma} B \right] \right) \quad (\text{A17})$$

92 In figure A1 we compare the models with and without demographical feedback. We  
 93 plot the equilibrium frequency of drug-resistance for both models. With the set of  
 94 parameters used in figure A1, drug-resistance appears for a smaller proportion of treated  
 95 individuals in the model without demographical feedback (8% instead of 14%). This  
 96 is because the initial asymmetry in population densities in the epidemiological model  
 97 reinforces the migration of sensitive parasites into the treated area, which hinders the  
 98 rise of drug-resistant parasites.

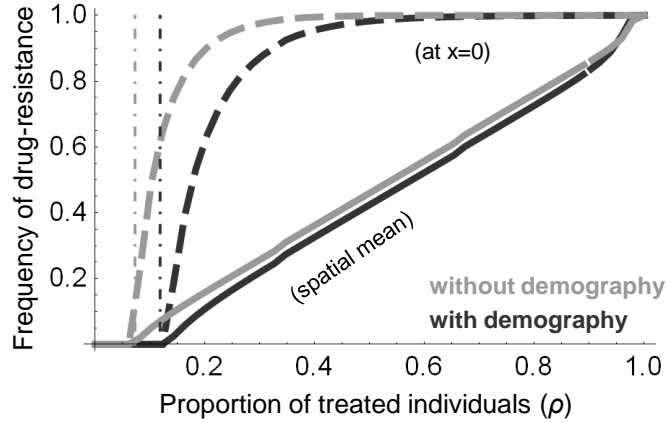

Figure A1: Comparison between with (darkgray) and without (lightgray) demographical feedback. The frequency of resistance depends on the proportion of treated individuals. The full curves show the spatial mean of the frequency of resistance, and the dashed curves the maximal frequency, at  $x = 0$ . The vertical dot-dashed lines show the analytical critical proportions of treated individuals, which are derived from equation (8) in the main text, and equation (A17) here. Parameters:  $(A + B)/\sigma = 10, N = 100, \beta_{\text{WT}}^{\text{T}} = 0.02, \beta_{\text{WT}}^{\text{U}} = 0.06, \beta_{\text{R}} = 0.03, \gamma_{\text{WT}}^{\text{T}} = 1.25, \gamma_{\text{WT}}^{\text{U}} = 1, \gamma_{\text{R}} = 1.2$  ( $R_0^{\text{WT,U}} = 6, R_0^{\text{WT,T}} = 1.6, R_0^{\text{R}} = 2.5$ )



## 99 2 Vector-borne transmission model

### 100 2.1 Full Model

101 The full model reads:

$$\frac{\partial I_{\text{WT}}}{\partial t} = \beta_{\text{WT}}^{\text{U}} g_{\beta}(x) V_{\text{WT}} (N_{\text{H}} - I_{\text{WT}} - I_{\text{R}}) - \gamma_{\text{WT}}^{\text{U}} g_{\gamma}(x) I_{\text{WT}} + \frac{\sigma_{\text{H}}^2}{2} \frac{\partial^2 I_{\text{WT}}}{\partial x^2} \quad (\text{A18a})$$

$$\frac{\partial V_{\text{WT}}}{\partial t} = b_{\text{WT}}^{\text{U}} g_b(x) I_{\text{WT}} (N_{\text{V}} - V_{\text{WT}} - V_{\text{R}}) - \nu_{\text{WT}}^{\text{U}} g_{\nu}(x) V_{\text{WT}} + \frac{\sigma_{\text{V}}^2}{2} \frac{\partial^2 V_{\text{WT}}}{\partial x^2} \quad (\text{A18b})$$

$$\frac{\partial I_{\text{R}}}{\partial t} = \beta_{\text{R}} V_{\text{R}} (N_{\text{H}} - I_{\text{WT}} - I_{\text{R}}) - \gamma_{\text{R}} I_{\text{R}} + \frac{\sigma_{\text{H}}^2}{2} \frac{\partial^2 I_{\text{R}}}{\partial x^2} \quad (\text{A18c})$$

$$\frac{\partial V_{\text{R}}}{\partial t} = b_{\text{R}} I_{\text{R}} (N_{\text{V}} - V_{\text{WT}} - V_{\text{R}}) - \nu_{\text{R}} V_{\text{R}} + \frac{\sigma_{\text{V}}^2}{2} \frac{\partial^2 V_{\text{R}}}{\partial x^2} \quad (\text{A18d})$$

102 Equations (A18a) and (A18c) describe the dynamics of the infected humans ( $I$ ),  
 103 where the first term represents new infections with strain  $i$ , happening at rate  $\beta_i$ , when  
 104 uninfected hosts ( $N_{\text{H}} - \sum_k I_k$ ) are bitten by infected vectors  $V_i$ ; the second term stands  
 105 for host recovery (or death); the last term represent hosts' migration, at range  $\sigma_{\text{H}}$ .  
 106 Equations (A18b) and (A18d) describe the dynamics of the vectors ( $V$ ), where the  
 107 first term represents new infections, which happen at rate  $b_i$  when uninfected vectors  
 108 ( $N_{\text{V}} - \sum_k V_k$ ) bite infected humans  $I_i$ ; the second term represents the vectors' death,  
 109 at rate  $\nu_i$  – corresponding to parasite clearance –; the last term accounts for vectors'  
 110 migration, at range  $\sigma_{\text{V}}$ . Note the total vector density  $N_{\text{V}}$  is constant, like the total  
 111 human density  $N_{\text{H}}$ .

112 Like in the direct-transmission model, the boundary conditions are periodic and re-  
 113 flecting.

## 114 2.2 Compound parameters

115 The basic reproductive ratios of strain  $i$  in area  $j$  with the vector-borne transmission  
 116 are:

$$R_0^{i,j} = \frac{N_H N_V \beta_i^j b_i^j}{\gamma_i^j \nu_i^j} \quad (\text{A19})$$

117 The initial asymmetries in the densities of the drug sensitive strain between habitats  
 118 are summarized in  $\tau_H$  (for humans) and  $\tau_V$  (for vectors):

$$\tau_H = \frac{\tilde{I}_{\text{WT}}^U}{\tilde{I}_{\text{WT}}^T} \quad (\text{A20a})$$

$$\tau_V = \frac{\tilde{V}_{\text{WT}}^U}{\tilde{V}_{\text{WT}}^T} \quad (\text{A20b})$$

119 where

$$\tilde{I}_{\text{WT}}^j = \frac{N_H N_V b_{\text{WT}}^j \beta_{\text{WT}}^j - \gamma_{\text{WT}}^j \nu_{\text{WT}}^j}{b_{\text{WT}}^j (N_V \beta_{\text{WT}}^j + \gamma_{\text{WT}}^j)} \quad (\text{A21a})$$

$$\tilde{V}_{\text{WT}}^j = \frac{N_H N_V b_{\text{WT}}^j \beta_{\text{WT}}^j - \gamma_{\text{WT}}^j \nu_{\text{WT}}^j}{\beta_{\text{WT}}^j (N_H b_{\text{WT}}^j + \nu_{\text{WT}}^j)} \quad (\text{A21b})$$

## 120 2.3 Equivalent migration

121 In a two-host model, the parasite must infect sequentially the host and its vector in  
 122 order to complete its life-cycle. Both host and vector can migrate and therefore let  
 123 the parasite move spatially. The human's (resp. vector's) infection duration is  $1/\gamma_R$   
 124 (resp.  $1/\nu_R$ ) when infected by a drug-resistant strain. Consequently, the parasite spends  
 125 a proportion  $q = \frac{1/\gamma_R}{1/\nu_R + 1/\gamma_R}$  of its life-cycle in the human compartment. This is  
 126 equivalent to a species which would migrate with a parameter  $\sigma_H$  during a proportion  
 127  $q$  of its life-cycle, and with a parameter  $\sigma_V$  during the remaining  $1 - q$ . The temporal

128 change in density  $X$  of this species, due to migration only, is

$$\begin{aligned}\frac{\partial X}{\partial t} &= q \frac{\sigma_H^2}{2} \frac{\partial^2 X}{\partial x^2} + (1-q) \frac{\sigma_V^2}{2} \frac{\partial^2 X}{\partial x^2} \\ &= \frac{\sigma_e^2}{2} \frac{\partial^2 X}{\partial x^2}\end{aligned}\tag{A22}$$

129 where

$$\sigma_e^2 = \frac{\sigma_V^2/\nu_R + \sigma_H^2/\gamma_R}{1/\nu_R + 1/\gamma_R}\tag{A23}$$

## 130 2.4 Drug-resistant strain's invasion condition

131 Linearizing around the equilibrium corresponding to a wholly drug sensitive parasite  
132 population, we obtain the following system (where  $k = \text{T}$  in the treated area, and  $k = \text{U}$   
133 in the untreated):

$$\frac{\partial}{\partial t} \begin{pmatrix} I_R \\ V_R \end{pmatrix} = M_k \begin{pmatrix} I_R \\ V_R \end{pmatrix} + \frac{1}{2} \begin{pmatrix} \sigma_H^2 \\ \sigma_V^2 \end{pmatrix} \frac{\partial^2}{\partial x^2} \begin{pmatrix} I_R \\ V_R \end{pmatrix}\tag{A24}$$

134 where

$$M_k = \begin{pmatrix} -\gamma_{\text{WT}}^k & \frac{\beta_{\text{WT}}^k \gamma_R (N_H b_R + \nu_R)}{b_R (N_V \beta_R + \gamma_R)} \\ \frac{b_{\text{WT}}^k \nu_R (N_V \beta_R + \gamma_R)}{\beta_R (N_H b_R + \nu_R)} & -\nu_{\text{WT}}^k \end{pmatrix}\tag{A25}$$

135 Let  $\lambda_{\text{T}}$  (resp.  $\lambda_{\text{U}}$ ) be the dominant eigenvalue of  $M_{\text{T}}$  (resp.  $M_{\text{U}}$ ):

$$\lambda_k = \frac{1}{2} \left( \sqrt{4 \frac{b_R \beta_R \gamma_{\text{WT}}^k \nu_{\text{WT}}^k}{\beta_{\text{WT}}^k b_{\text{WT}}^k} + (\gamma_R - \nu_R)^2} - (\gamma_R + \nu_R) \right)\tag{A26}$$

136 System (A24) can be approximated as:

$$\frac{\partial}{\partial t} \begin{pmatrix} I_R \\ V_R \end{pmatrix} = \lambda_k \begin{pmatrix} I_R \\ V_R \end{pmatrix} + \frac{1}{2} \sigma_e \frac{\partial^2}{\partial x^2} \begin{pmatrix} I_R \\ V_R \end{pmatrix}\tag{A27}$$

137 If we assume that selection is weak, we get the following approximation:

$$\lambda_k \approx \left( \frac{R_0^R}{R_0^{\text{WT},k}} - 1 \right) \frac{1}{1/\gamma_R + 1/\nu_R} \quad (\text{A28})$$

138 Then, the same method as with the one-host model is used, with  $s = \lambda_T$  and  $\alpha =$   
 139  $\sqrt{-\lambda_U/\lambda_T}$ . We however could not find a single equivalent for  $\tau$  (see system (A20) above),  
 140 and therefore obtain two critical sizes of the treated area ( $A_c^H$  and  $A_c^V$ ), depending on  
 141 whether the initial drug-resistant free equilibrium densities are evaluated in the human  
 142 or vector compartments.

## 143 2.5 Drug-sensitive strain's invasion condition

144 We use the same method as above, and find that the drug-sensitive parasites can invade  
 145 a drug-resistant parasite population when the size of the untreated area,  $B$ , is above a  
 146 critical size  $B_c$ . This critical size reads:

$$B_c = \frac{\sigma_e}{\sqrt{2}} \frac{1}{\sqrt{\lambda'_U}} \arctan \left( \sqrt{-\frac{\lambda'_T}{\lambda'_U}} \tanh \left[ \sqrt{-\lambda'_T} \frac{\sqrt{2}}{\sigma_e} A \right] \right) \quad (\text{A29})$$

147 with ( $k = T$  or  $k = U$ )

$$\lambda'_k = \frac{1}{2} \left( \sqrt{\frac{4 b_{\text{WT}}^k \beta_{\text{WT}}^k \gamma_R \nu_R}{b_R \beta_R} + (\gamma_{\text{WT}}^k - \nu_{\text{WT}}^k)^2 - (\gamma_{\text{WT}}^k + \nu_{\text{WT}}^k)} \right) \quad (\text{A30})$$

## 148 References

- 149 [1] Nagylaki T (1978) Clines with asymmetric migration. *Genetics* 88:813–827.
- 150 [2] Pacala SW, Roughgarden J (1982) Spatial Heterogeneity and Interspecific Competition.  
151 *Theor Popul Biol* 21:92–113.
- 152 [3] Nuismer SL, Thompson JN, Gomulkiewicz R (2000) Coevolutionary clines across selection  
153 mosaics. *Evolution* 54:1102–1115.
- 154 [4] Nagylaki T (1975) Conditions for the existence of clines. *Genetics* 80:595–615.
- 155 [5] Sasaki T (2004) The effect of local prevention in an SIS model with diffusion. *Discrete Cont*  
156 *Dyn-B* 4:739–746.
- 157 [6] Heffernan JM, Smith RJ, Wahl LM (2005) Perspectives on the basic reproductive ratio. *J R*  
158 *Soc Interface* 2:281–293. doi:10.1098/rsif.2005.0042. URL [http://dx.doi.org/10.1098/](http://dx.doi.org/10.1098/rsif.2005.0042)  
159 [rsif.2005.0042](http://dx.doi.org/10.1098/rsif.2005.0042).
